1 Time-series trend of pandemic SARS-CoV-2 variants visualized using batch-learning self-organizing  
2 map for oligonucleotide compositions

3

4 Takashi Abe<sup>1,\*</sup>, Ryuki Furukawa<sup>1</sup>, Yuki Iwasaki<sup>2</sup>, Toshimichi Ikemura<sup>2,\*</sup>

5

6 1. Smart Information Systems, Faculty of Engineering, Niigata University, Niigata-ken 950-2181,  
7 Japan

8 2. Department of Bioscience, Nagahama Institute of Bio-Science and Technology, Shiga-ken 526-  
9 0829, Japan

10

11 \* **CORRESPONDENCES:**

12 Takashi Abe (takaabe@ie.niigata-u.ac.jp) and Toshimichi Ikemura (t\_ikemura@nagahama-i-  
13 bio.ac.jp)

14

15 **AUTHORS' CONTRIBUTIONS**

16 TA and TI conceived and designed research; TA, RF, and TI performed research; TA, RF, and YI  
17 analyzed data; and all authors wrote the paper.

18

19 **ABSTRACT**

20 To confront the global threat of coronavirus disease 2019, a massive number of the severe acute  
21 respiratory syndrome coronavirus 2 (SARS-CoV-2) genome sequences have been decoded, with the  
22 results promptly released through the GISAID database. Based on variant types, eight clades have  
23 already been defined in GISAID, but the diversity can be far greater. Owing to the explosive increase  
24 in available sequences, it is important to develop new technologies that can easily grasp the whole  
25 picture of the big-sequence data and support efficient knowledge discovery. An ability to efficiently  
26 clarify the detailed time-series changes in genome-wide mutation patterns will enable us to promptly  
27 identify and characterize dangerous variants that rapidly increase their population frequency. Here,  
28 we collectively analyzed over 150,000 SARS-CoV-2 genomes to understand their overall features  
29 and time-dependent changes using a batch-learning self-organizing map (BLSOM) for  
30 oligonucleotide composition, which is an unsupervised machine learning method. BLSOM can  
31 separate clades defined by GISAID with high precision, and each clade is subdivided into clusters,  
32 which shows a differential increase/decrease pattern based on geographic region and time. This  
33 allowed us to identify prevalent strains in each region and to show the commonality and diversity of  
34 the prevalent strains. Comprehensive characterization of the oligonucleotide composition of SARS-  
35 CoV-2 and elucidation of time-series trends of the population frequency of variants can clarify the  
36 viral adaptation processes after invasion into the human population and the time-dependent trend of  
37 prevalent epidemic strains across various regions, such as continents.

38

39 **KEYWORDS**

40 COVID-19, SARS-CoV-2, Oligonucleotide composition, Batch-Learning Self-Organizing Map  
41 (BLSOM), Unsupervised explainable machine learning, Time-series trend

42

## 43 INTRODUCTION

44

45 The severe acute respiratory syndrome coronavirus 2 (SARS-CoV-2) has spread rampantly  
46 worldwide since it was first reported in December 2019, and its momentum is still ongoing (WHO.  
47 2020). To address the SARS-CoV-2 pandemic in detail, genome sequencing has been performed on a  
48 global scale and published by GISAID (Elbe et al. 2017), the SARS-CoV-2 genome database, having  
49 more than 780,000 viral sequences as of March 2021 (<https://www.gisaid.org/>). SARS-CoV-2 is an  
50 RNA virus with a fast evolutionary rate that has already been classified into eight clades by GISAID,  
51 and epidemics caused by new variant have been known to occur (Benvenuto et al. 2020; Gorbalenya  
52 et al. 2020; Sun et al. 2020; Hu et al. 2021; Kirby 2021; Wang et al. 2021). Because the number of  
53 registered genome sequences is increasing explosively, it has become difficult to cope with the  
54 current and future situation using only the conventional phylogenetic tree method based on multiple  
55 sequence alignment, which requires an enormous amount of computation time for a massive number  
56 of sequences. Therefore, it is imperative to develop a sequence alignment-free method that will  
57 enable us to easily grasp the whole picture of the big-sequence data and support efficient knowledge  
58 discovery from it.

59 By focusing on the frequency of short oligonucleotides (e.g., tetra- and penta-nucleotides) in a  
60 large number of genomic fragments (e.g., 10 kb) derived from a wide variety of species, we have  
61 developed an unsupervised explainable AI (batch-learning self-organizing map; BLSOM), which  
62 enables separation (self-organization) of the genomic sequences by species and phylogeny and  
63 explains the causes that contribute to this separation (Abe et al. 2003 ). In the analysis of genomic  
64 fragments of a wide range of microbial genomes, over 5 million sequences can be separated by  
65 phylogenetic groups with high accuracy (Abe et al. 2020).

66 In a prior analysis of all influenza A strains, viral genomes were separated (self-organized) by host

67 animals based only on the similarity of the oligonucleotide composition, although no host  
68 information was provided during BLSOM learning (Iwasaki et al. 2011). On a single map, all viral  
69 sequences could be separated, and notably, BLSOM is an explainable AI that can explain diagnostic  
70 oligonucleotides, which contribute to host-dependent clustering. When studying the 2009 swine-  
71 derived flu pandemic (H1N1/2009), we could detect directional time-series changes in  
72 oligonucleotide composition because of possible adaptations to the new host, namely humans  
73 (Iwasaki et al. 2011), showing that near-future prediction was possible, albeit partially (Iwasaki et al.  
74 2013).

75 We have previously revealed lineage-specific oligonucleotide compositions for a wide range of virus  
76 lineages and established a method to identify and classify viral-derived sequences in tick intestinal  
77 metagenomic sequences (Qiu et al. 2019). In the case of SARS-CoV-2, we analyzed time-series  
78 changes in mono- and oligo-nucleotide compositions and found their time-dependent directional  
79 changes that are thought to be adaptive for growth in humans, which allowed us to predict candidates  
80 of advantageous mutations for growth in human cells (Ikemura et al. 2020; Wada, Wada & Ikemura.  
81 2020; Iwasaki Abe & Ikemura. 2021). Furthermore, we recently performed BLSOM analysis on di- to  
82 penta-nucleotide compositions in approximately 150,000 SARS-CoV-2 genomes. Because the  
83 accuracy of separation by clade increased as the oligonucleotide length increased, in this report, we  
84 present the BLSOM results for the pentanucleotide composition. BLSOM could serve as a powerful  
85 tool for elucidating comprehensive characterization of the oligonucleotide composition of SARS-CoV-  
86 2 and time-series trends of prevalent epidemic strains across various regions, such as continents.

87

## 88 **METHODS**

89

90 *SARS-CoV-2 genome sequences*

91 The full-length genome sequences of SARS-CoV-2 were downloaded from the GISAID database on  
92 November 4, 2020. The total number of sequences was 170,190. From these sequences, those with a  
93 length of more than 27 kb after removing the polyA-tail sequences were selected.

94

#### 95 *Oligonucleotide frequency and odds ratio*

96 Pentanucleotide frequencies and odds ratios were used in the present study. The pentanucleotide odd  
97 ratios (observed/expected values) were calculated using the formula  $P_{VWXYZ} = f_{VWXYZ} / f_V f_W f_X f_Y f_Z$ ,  
98 where  $f_V$ ,  $f_W$ ,  $f_X$ ,  $f_Y$  and  $f_Z$  denote the frequencies of mononucleotides V, W, X, Y and Z,  
99 respectively, and  $f_{VWXYZ}$  denotes the frequency of pentanucleotide VWXYZ (Karlin et al. 1998).

100

#### 101 *BLSOM*

102 Kohonen's self-organizing map (SOM), an unsupervised neural network algorithm, is a powerful  
103 tool for clustering and visualizing high-dimensional complex data on a two-dimensional map  
104 (Kohonen, 1990; Kohonen et al., 1996). We modified the conventional SOM for genome informatics  
105 on the basis of batch learning, aiming to make the learning process and the resulting map  
106 independent of the order of data input (Kanaya et al. 2001; Abe et al. 2003). The newly developed  
107 SOM, BLSOM, is suitable for high-performance parallel computing and, therefore, for big data  
108 analysis. The initial weight vectors were defined using principal component analysis (PCA), based  
109 on the variance-covariance matrix, rather than by using random values. The weight vectors ( $w_{ij}$ )  
110 were arranged in a two-dimensional lattice denoted by  $i$  ( $= 0, 1, \dots, I-1$ ) and  $j$  ( $= 0, 1, \dots, J-1$ ) and  
111 were set and updated as described previously (Kanaya et al. 2001; Abe et al. 2003). A BLSOM  
112 program suitable for PC cluster systems is available on our website ([http://bioinfo.ie.niigata-](http://bioinfo.ie.niigata-u.ac.jp/?BLSOM)  
113 [u.ac.jp/?BLSOM](http://bioinfo.ie.niigata-u.ac.jp/?BLSOM)).

114

115 **RESULTS and DISCUSSION**

116

117 *BLSOM for pentanucleotide composition and their odds ratio*

118 It should be mentioned here that SARS-CoV-2 genomes have changed their mononucleotide  
119 composition during the course of the epidemic in humans, reducing C and increasing U, regardless  
120 of clade (Mercatelli et al. 2020; Wada, Wada & Ikemura. 2020; Iwasaki Abe & Ikemura 2021), a  
121 process which is thought to be caused by the APOBEC family enzymes (Mangeat et al. 2003;  
122 Simmonds 2020). Considering this clade-independent tendency, we performed BLSOM analysis of  
123 not only the pentanucleotide composition but also their odds ratio, which can reduce the effects  
124 caused by changes in the mononucleotide composition. Additionally, to check the robustness of  
125 sequence accuracy, we used datasets with different sequence accuracies: 167,905 sequences with less  
126 than 10% unknown nucleotides other than ATGCs in the genome sequence and 130,753 sequences  
127 with less than 1% unknown nucleotides; for each sequence dataset, the number of cases by region  
128 and clade is shown in Table 1.

129 First, we constructed BLSOM for sequences with less than 10% unknown nucleotides, using the  
130 pentanucleotide composition and their odds ratios (Figure 1A and B). BLSOM utilizes unsupervised  
131 machine learning, and the genome sequences are clustered (self-organized) on a two-dimensional  
132 plane, based only on the difference in the vector data in a 1024 ( $=4^5$ )-dimensional space. Lattice  
133 points that include sequences from more than one clade are indicated in black, those that contain no  
134 genomic sequences are indicated by blank, and those containing sequences from a single clade are  
135 indicated in the color representing the clade. The odds ratio (Figure 1B) gave more accurate  
136 separations (a smaller percentage of black grid points), possibly by excluding effects owing to the  
137 clade-independent time-series change in the mononucleotide composition (Iwasaki Abe & Ikemura.  
138 2021), which affected all SARS-CoV-2 clades. Even for the sequences with low-sequence accuracy,

139 clade-dependent separation occurs, allowing us to understand characteristics of the oligonucleotide  
140 composition that are specific to each clade; thus, oligonucleotide-BLSOM is thought to be a robust  
141 method. However, it is clear that BLSOMs for sequences with less than 1% unknown nucleotides  
142 (Figure 1C and D) gave more accurate separation than those listed in Figure 1A and B, and the  
143 highest resolution was obtained for the BLSOM for the odds ratio (Figure 1D).

144 Clades have been defined by the statistical distribution of phylogenetic distances in tree  
145 construction based on multiple sequence alignments (Han et al. 2019; Tang et al. 2020), whereas  
146 BLSOM is a sequence alignment-free analysis that is suitable for the analysis of massive data.  
147 Because sequences at different locations on BLSOM have different oligonucleotide compositions,  
148 clustering according to clades means that sequences belonging to different clades have different  
149 oligonucleotide combinations, that is, differential combinations of mutations.

150

### 151 *3D display of the data for different continents*

152 Using BLSOM (Figure 1D) for the pentanucleotide odds ratio, Figure 1E examines the classification  
153 according to four continents (Asia, Europe, North America, and Oceania) that have large numbers of  
154 sequences. Here, the lattice points containing sequences of different continents are displayed in  
155 black, and those containing only sequences of a single continent are displayed in the color specifying  
156 each continent. Although not as clear as clade-dependent separations, regional differences have been  
157 observed, which should reflect differential shares of prevalent variants among continents. However,  
158 it is apparently difficult to obtain sufficient information from the results shown in Figure 1E alone.  
159 BLSOM is equipped with various visualization tools for analysis results; therefore, we next show the  
160 number of sequences belonging to each lattice point with a 3D display.

161 Again, using the BLSOM shown in Figure 1D, Figure 2 shows the number of sequences  
162 belonging to each lattice point for each clade in each continent as a vertical bar, which is colored by

163 continent, as shown in Figure 1E. Looking laterally at a particular clade, each clade consists of  
164 several subclusters, each consisting of several high peaks surrounded by many low peaks. Different  
165 subclusters observed in each clade are distinguished by numbering in each figure, but if they are  
166 located in the same zone on BLSOM, the same number is given even if they are of different  
167 continents. Looking vertically at a particular continent, sequences of different subclusters of  
168 different clades exist in different amounts, and some subclusters are only in a particular continent,  
169 that is, the prevalent variants for each continent can be visualized in an easy-to-understand manner.  
170 In Supplementary Figure S1, the data shown in Figure 2 are displayed in 2D, and referring to the  
171 quantitative results in Figure 2, we defined sequences attributed to each subcluster in each clade.

172

### 173 *Time-series analysis*

174 The fact that sequences belonging to one clade were clearly separated on BLSOM indicates the  
175 importance of subdivision of each clade, and the separation on BLSOM is thought to be a good  
176 indicator of this subdivision. To further examine the biological significance of the subclusters of  
177 each clade on BLSOM, we visualized the number of sequences collected in each month in each  
178 region as a vertical bar differentially colored according to clade (Figure 3). Looking laterally at a  
179 continent, the time-series quantitative changes among different clades or different subclusters of one  
180 clade are clear. Looking at the results for a particular collection month for different continents  
181 longitudinally, quantitative changes among different clades or different subclusters of one clade are  
182 again clear, depending on the continent.

183 Next, for each clade in each continent, we quantitatively analyzed the time-series changes in the  
184 proportion of its subclusters using a 100% stack bar graph (Figure 4). The percentage of sequences  
185 in different subclusters are distinguished by different colors, and when a total number of sequences  
186 for a certain month is more than 100, the data for that month is indicated by a thick horizontal bar.



187 We focused mainly on such months.

188 In the clade S/L/V detected in the early stage of the epidemic (December 2019– March 2020),  
189 three major subclusters of each clade were observed and distinguished by suffix numbers, and most  
190 sequences belonged to the two subclusters: S1/L1/V1 and S2/L2/V2. In Asia, many sequences  
191 belonging to S1/L1/V1 were detected in December 2019, but in Europe and other regions, S2/L2/V2  
192 were more abundantly detected in March and April 2020 than S1/L1/V1, and the proportion became  
193 more pronounced in April than in March. In March and April in Europe, a remarkable number of  
194 sequences belonging to S3/L3/V3 were also detected, showing three different variants prevalent at  
195 the beginning of the epidemic in Europe. Far fewer than 100 sequences were detected after May;  
196 sequences belonging to S1/L1/V1 were mainly detected in Asia and those belonging to S2/L2/V2  
197 were shown in other regions, presenting differential trends in prevalent variants among continents.

198 For clade G, which started the epidemic in Europe in February, we defined five subclusters. In  
199 February, roughly equal amounts of sequences belonging to G1 and G2 were detected in Europe and  
200 North America, but as the epidemic progressed, those belonging to G2 were mainly detected in  
201 Europe, whereas those belonging to both G1 and G2 were prevalent in North America. In Asia, only  
202 sequences belonging to G1 are detected; in Oceania, those belonging to G2 accounted for about 10%  
203 in the early stage, but afterward, those belonging to Oceania-specific G5 accounted for the majority.

204 For GH, we defined seven subclusters, including GH1 and GH2, which dominated in North  
205 America and Europe, respectively. In North America, in addition to GH1, several months contain  
206 approximately 20% of the sequences belonging to GH3, GH5, and GH6. In Asia, only GH1 has been  
207 detected. In Oceania, only GH4 and GH7, which were specific to this region, were detected; initially,  
208 GH4 was dominant, but after July, GH7 was primarily detected.

209 For GR, we defined five subclusters, including GR1 and GR2, which dominated in North America  
210 and Europe, respectively. Moreover, in Europe, GR1 was detected to the same extent as GR2 in

211 February, but as the epidemic progressed, GR2 began to predominate. In North America, the  
212 occupancy of GR1 and GR2 varied to some extent depending on the collection month. In Asia, GR1  
213 was mainly detected, and in Oceania, only region-specific subclusters have been detected.

214 These temporospatial changes in subclusters show that the subcluster is the separation (self-  
215 organization) that reflects biological significance and is fundamental information for understanding  
216 the overall picture of the SARS-CoV-2 variants.

217

## 218 **CONCLUSION and PERSPECTICES**

219

220 Based on the phylogenetic tree construction by multiple sequence alignments, GISAID has defined  
221 seven clades of SARS-CoV-2, giving a total of eight if clade O corresponding to others is included.  
222 However, these classifications are clearly inadequate to understand the current status of SARS-CoV-  
223 2 because this RNA virus evolves at a high speed. Using only the oligonucleotide composition of  
224 many genomic sequences, the unsupervised machine learning, BLSOM, could separate viral  
225 sequences according to not only clades but also subclusters within each clade. The separation (self-  
226 organization) that AI can accomplish without any hypothesis or model is thought to be a  
227 classification from a new perspective. BLSOM is equipped with various tools that allow us to  
228 visualize the analysis results in an easily understandable way and to visualize differences in the  
229 number of subcluster sequences among continents (Figure 2) and their time-series changes (Figure  
230 3), i.e., the distinct variations in the resulting subclusters depending on the region and the collection  
231 time.

232 Herein, we focused on pentanucleotide composition, but similar separations were obtained for  
233 other lengths of oligonucleotides (Ikemura et al. 2020). BLSOM is an explanatory AI that can clarify  
234 combinatorial patterns of oligonucleotides that contribute to the separation according to clades and

235 their subclusters. BLSOM is a powerful method for elucidating comprehensive characterization of  
236 the oligonucleotide composition in a massive number of SARS-CoV-2 genome sequences. Next, it  
237 will be important to know the relationship between the strains isolated in clades and their subclusters  
238 and the causative mutations. When it comes to oligonucleotides as long as 15-mers, most are only  
239 present in one copy in the viral genome; therefore, changes in 15-mer sequences can be directly  
240 linked to mutations, and we have already started analysis from this perspective (Ikemura et al. 2020).  
241 The implementation of time-series oligonucleotide analysis of variants with rapidly expanding intra-  
242 population frequencies has enabled the identification of candidates for advantageous mutations for  
243 viral infection and growth in human cells (Wada, Wada & Ikemura. 2020).

244 Phylogenetic methods based on sequence alignment have been widely used in evolutionary studies  
245 (Hadfield et al. 2018; Kumar et al. 2018), and these methods are undoubtedly essential for studying  
246 the phylogenetic relationships between different viral species and variations in the same virus at the  
247 single-nucleotide level. In contrast, AI can analyze a massive number of SARS-CoV-2 sequences at  
248 once without difficulty, potentially reaching a level of one million in the near future. The AI method  
249 for oligonucleotide composition has become increasingly important as a complement to the  
250 phylogenetic tree construction method in preparing for future outbreaks of various infectious RNA  
251 viruses.

252

## 253 **ACKNOWLEDGEMENTS**

254

255 We gratefully acknowledge the authors submitting their sequences from GISAID's Database.

256

## 257 **FUNDING INFORMATION**

258

259 This research was supported by AMED Grant Number JP20he0622033h0001, and by JST, CREST

260 Grant Number JPMJCR20H1, and by KAKENHI Grant Number 18K07151 and 20H03140.

261

262 **CONFLICT OF INTEREST**

263

264 The authors declare that there is no conflict of interests regarding the publication of this paper.

265

266 **TABLE**

267 Table 1. Number of SARS-CoV-2 genome sequences with less than 10% (A) and less than 1% (B)

268 unknown nucleotides used in this study.

269

(A) Number of sequences with less than 10% unknown nucleotides

| Clade \ Continent | Asia  | Europe | North America | Oceania | Africa | South America | Unknown | Total   |
|-------------------|-------|--------|---------------|---------|--------|---------------|---------|---------|
| S                 | 794   | 1,860  | 3,449         | 664     | 110    | 74            | 0       | 6,951   |
| L                 | 823   | 3,196  | 600           | 65      | 4      | 11            | 0       | 4,699   |
| V                 | 247   | 4,687  | 402           | 253     | 13     | 23            | 0       | 5,625   |
| G                 | 979   | 20,928 | 6,568         | 1,106   | 1,141  | 461           | 0       | 31,183  |
| GH                | 2,058 | 10,325 | 23,916        | 964     | 232    | 176           | 0       | 37,671  |
| GR                | 2,657 | 42,888 | 5,251         | 11,135  | 1,632  | 1,129         | 0       | 64,692  |
| GV                | 3     | 12,229 | 3             | 14      | 0      | 0             | 0       | 12,249  |
| O                 | 2,220 | 1,127  | 553           | 531     | 60     | 25            | 0       | 4,516   |
| Non-human host    | 35    | 247    | 19            | 0       | 1      | 4             | 13      | 319     |
| #Total            | 9,816 | 97,487 | 40,761        | 14,732  | 3,193  | 1,903         | 13      | 167,905 |

(B) Number of sequences with less than 1% unknown nucleotides

| Clade \ Continent | Asia  | Europe | North America | Oceania | Africa | South America | Unknown | Total   |
|-------------------|-------|--------|---------------|---------|--------|---------------|---------|---------|
| S                 | 731   | 1,047  | 3,056         | 466     | 71     | 58            | 0       | 5,429   |
| L                 | 760   | 1,964  | 549           | 49      | 2      | 10            | 0       | 3,334   |
| V                 | 228   | 3,036  | 366           | 207     | 10     | 17            | 0       | 3,864   |
| G                 | 877   | 15,200 | 5,071         | 858     | 634    | 300           | 0       | 22,940  |
| GH                | 1,923 | 8,365  | 19,014        | 717     | 191    | 150           | 0       | 30,360  |
| GR                | 2,425 | 32,518 | 4,549         | 9,166   | 1,180  | 871           | 0       | 50,709  |
| GV                | 3     | 10,712 | 3             | 11      | 0      | 0             | 0       | 10,729  |
| O                 | 1,824 | 522    | 349           | 415     | 30     | 9             | 0       | 3,149   |
| Non-human host    | 30    | 176    | 19            | 0       | 1      | 0             | 13      | 239     |
| #Total            | 8,801 | 73,540 | 32,976        | 11,889  | 2,119  | 1,415         | 13      | 130,753 |

270 Unknown: genome sequences for which continent was not registered

271

272

273 **FIGURE LEGENDS**

274

275 Figure 1. BLSOM for pentanucleotide usage. (A) Pentanucleotide composition and (B) their odds  
276 ratio for sequences with less than 10% unknown nucleotides. (C) Pentanucleotide composition and  
277 (D) their odds ratio for sequences with less than 1% unknown nucleotides. Lattice points that include  
278 sequences from more than one clade are indicated in black, those that contain no genomic sequences  
279 are indicated by blank, and those containing sequences from a single clade are indicated in color as  
280 follows: S (■), L (■), V (■), G (■), GH (■), GR (■), GV (■), O (■), non-human host  
281 (■). (E) Distribution of sequences by continent on the BLSOM with the pentanucleotide odds ratio.  
282 Lattice points that include sequences from more than one continent are indicated in black, those that  
283 contain no genomic sequences are indicated by blank, and those containing sequences from a single  
284 continent are indicated in color as follows: Asia (■), Europe (■), North America (■), Oceania  
285 (■).

286

287 Figure 2. 3D display of viral classification by clade and continent. The Z-axis corresponds to the  
288 number of sequences attributed to each lattice point. Results for all continents are shown in the ALL  
289 panel for each clade. In clades G, GH, GR and GV, lattice points where less than 5 sequences exist  
290 are not shown. The vertical bars for individual continents are distinguished by the following colors:  
291 Asia (■), Europe (■), North America (■), Oceania (■). Different subclusters are given suffix  
292 numbers.

293

294 Figure 3. 3D display of temporospatial changes. The Z-axis corresponds to the number of sequences

295 attributed to each lattice point. Results for all collection months are shown in the ALL panel for each  
296 continent. The vertical bars for individual clades are distinguished by the following colors: S (■), L  
297 (■), V (■), G (■), GH (■), GR (■), GV (■).

298

299 Figure 4. Analysis of 100% stack bar graph for time-series transition in each continent for each  
300 subcluster in clades S (A), L (B), V (C), G (D), GH (E) and GR (F). The colors of each subcluster  
301 are indicated at the bottom of each figure. The results for months with more than 100 sequences are  
302 shown as thick horizontal bars. The number of sequences used in this analysis is given in  
303 Supplementary Table S1.

304

305 **SUPPLEMENTARY DATA**

306

307 Supplementary Figure S1. 2D display of the classification by clade and continent shown in Figure 2.

308 Each subcluster territory is circled by a dotted line. In clades G, GH, GR and GV, lattice points

309 where less than 5 sequences exist are not shown. The sequences belonging to each territory defined

310 here are used for the analysis in Figure 4.

311

312 Supplementary Table S1. Sequence number of subdivided clusters in clade for each month by

313 continent.

314

315



316 **REFERENCES**

317

318 Abe T, Kanaya S, Kinouchi M, Ichiba Y, Kozuki T, Ikemura T. 2003. Informatics for unveiling hidden  
319 genome signatures. *Genome research* 13: 693-702. DOI: <http://dx.doi.org/10.1101/gr.634603>

320

321 Abe T, Akazawa Y, Toyoda A, Niki H, Baba T. 2020. Batch-Learning Self-Organizing Map Identifies  
322 Horizontal Gene Transfer Candidates and Their Origins in Entire Genomes. *Frontiers in microbiology*  
323 11: 1486. DOI: <http://dx.doi.org/10.3389/fmicb.2020.01486>

324

325 Benvenuto D, Giovanetti M, Salemi M, Prosperi M, De Flora C, Junior Alcantara LC, Angeletti S,  
326 Ciccozzi M. 2020. The global spread of 2019-nCoV: a molecular evolutionary analysis. *Pathogens and*  
327 *global health* 114: 64-67. DOI: <http://dx.doi.org/10.1080/20477724.2020.1725339>

328

329 Elbe S, Buckland-Merrett G. 2017. Data, disease and diplomacy: GISAID's innovative contribution to  
330 global health. *Global challenges (Hoboken, NJ)* 1: 33-46. DOI: <http://dx.doi.org/10.1002/gch2.1018>

331

332 Gorbalenya AE, Baker SC, Baric RS, de Groot RJ, Drosten C, Gulyaeva AA, Haagmans BL, Lauber  
333 C, Leontovich AM, Neuman BW et al. 2020. The species Severe acute respiratory syndrome-related  
334 coronavirus: classifying 2019-nCoV and naming it SARS-CoV-2. *Nature microbiology* 5: 536-544.  
335 DOI: <http://dx.doi.org/10.1038/s41564-020-0695-z>

336

337 Hadfield J, Megill C, Bell SM, Huddleston J, Potter B, Callender C, Sagulenko P, Bedford T, Neher  
338 RA. 2018. Nextstrain: real-time tracking of pathogen evolution. *Bioinformatics (Oxford, England)* 34:

339 4121-4123. DOI: [10.1093/bioinformatics/bty407](https://doi.org/10.1093/bioinformatics/bty407)

340

341 Han AX, Parker E, Scholer F, Maurer-Stroh S, Russell CA. 2019. Phylogenetic Clustering by Linear  
342 Integer Programming (PhyCLIP). *Molecular Biology and Evolution* 36: 1580-1595. DOI:  
343 <http://dx.doi.org/10.1093/molbev/msz053>

344

345 Hu B, Guo H, Zhou P, Shi ZL. 2021. Characteristics of SARS-CoV-2 and COVID-19. *Nature reviews*  
346 *Microbiology* 19: 141-154. DOI: <http://dx.doi.org/10.1038/s41579-020-00459-7>

347

348 Ikemura T, Wada K, Wada Y, Iwasaki Y, Abe T. 2020. Unsupervised explainable AI for simultaneous  
349 molecular evolutionary study of forty thousand SARS-CoV-2 genomes. *bioRxiv*.  
350 DOI:10.1101/2020.10.11.335406; 2020.2010.2011.335406.

351

352

353 Iwasaki Y, Abe T, Wada K, Itoh M, Ikemura T. 2011. Prediction of directional changes of influenza A  
354 virus genome sequences with emphasis on pandemic H1N1/09 as a model case. *DNA research* 18:  
355 125-136. DOI: <http://dx.doi.org/10.1093/dnares/dsr005>

356

357 Iwasaki Y, Abe T, Wada Y, Wada K, Ikemura T. 2013. Novel bioinformatics strategies for prediction  
358 of directional sequence changes in influenza virus genomes and for surveillance of potentially  
359 hazardous strains. *BMC infectious diseases* 13: 386. DOI: [http://dx.doi.org/10.1186/1471-2334-13-](http://dx.doi.org/10.1186/1471-2334-13-386)  
360 386

361

362 Iwasaki Y, Abe T, Ikemura T. 2021. Human cell-dependent, directional, time-dependent changes in the  
363 mono- and oligonucleotide compositions of SARS-CoV-2 genomes. *bioRxiv*.

364 DOI:10.1101/2021.01.05.425508: 2021.2001.2005.425508.

365

366 Kanaya S, Kinouchi M, Abe T, Kudo Y, Yamada Y, Nishi T, Mori H, Ikemura T. 2001. Analysis of  
367 codon usage diversity of bacterial genes with a self-organizing map (SOM): characterization of  
368 horizontally transferred genes with emphasis on the E. coli O157 genome. *Gene* 276: 89-99. DOI:  
369 10.1016/s0378-1119(01)00673-4

370

371 Karlin S, Campbell AM, Mrazek J. 1998. Comparative DNA analysis across diverse genomes. *Annual*  
372 *review of genetics* 32: 185-225.

373

374 Kirby T. 2021. New variant of SARS-CoV-2 in UK causes surge of COVID-19. *The Lancet*  
375 *Respiratory medicine* 9: e20-e21. DOI: [http://dx.doi.org/10.1016/s2213-2600\(21\)00005-9](http://dx.doi.org/10.1016/s2213-2600(21)00005-9)

376

377 Kohonen T. 1990. The self-organizing map. *Proceedings of the IEEE* 78: 1464-1480. DOI:  
378 10.1109/5.58325

379

380 Kohonen T, Oja E, Simula O, Visa A, Kangas J. 1996. Engineering applications of the self-organizing  
381 map. *Proceedings of the IEEE* 84: 1358-1384. DOI: 10.1109/5.537105

382

383 Kumar S, Stecher G, Li M, Knyaz C, Tamura K. 2018. MEGA X: Molecular Evolutionary Genetics  
384 Analysis across Computing Platforms. *Mol Biol Evol* 35: 1547-1549. DOI: 10.1093/molbev/msy096

385

386 Mangeat B, Turelli P, Caron G, Friedli M, Perrin L, Trono D. 2003. Broad antiretroviral defence by  
387 human APOBEC3G through lethal editing of nascent reverse transcripts. *Nature* 424: 99-103. DOI:

388 <http://dx.doi.org/10.1038/nature01709>

389

390 Mercatelli D, Giorgi FM. 2020. Geographic and Genomic Distribution of SARS-CoV-2 Mutations.

391 *Frontiers in microbiology* 11: 1800. DOI: <http://dx.doi.org/10.3389/fmicb.2020.01800>

392

393 Qiu Y, Abe T, Nakao R, Satoh K, Sugimoto C. 2019. Viral population analysis of the taiga tick, *Ixodes*

394 *persulcatus*, by using Batch Learning Self-Organizing Maps and BLAST search. *The Journal of*

395 *veterinary medical science* 81: 401-410. DOI: <http://dx.doi.org/10.1292/jvms.18-0483>

396

397 Simmonds P. 2020. Rampant C→U Hypermutation in the Genomes of SARS-CoV-2 and Other

398 Coronaviruses: Causes and Consequences for Their Short- and Long-Term Evolutionary Trajectories.

399 *mSphere* 5. DOI: <http://dx.doi.org/10.1128/mSphere.00408-20>

400

401 Sun J, He WT, Wang L, Lai A, Ji X, Zhai X, Li G, Suchard MA, Tian J, Zhou J et al. 2020. COVID-

402 19: Epidemiology, Evolution, and Cross-Disciplinary Perspectives. *Trends in molecular medicine* 26:

403 483-495. DOI: <http://dx.doi.org/10.1016/j.molmed.2020.02.008>

404

405 Tang X, Wu C, Li X, Song Y, Yao X, Wu X, Duan Y, Zhang H, Wang Y, Qian Z et al. 2020. On the

406 origin and continuing evolution of SARS-CoV-2. *National Science Review* 7: 1012-1023 %@ 2095-

407 5138. DOI: <http://dx.doi.org/10.1093/nsr/nwaa036>

408

409 Wada K, Wada Y, Ikemura T. 2020. Time-series analyses of directional sequence changes in SARS-

410 CoV-2 genomes and an efficient search method for candidates for advantageous mutations for growth

411 in human cells. *Gene: X* 5: 100038. DOI: <http://dx.doi.org/10.1016/j.gene.2020.100038>

412

413 Wang R, Chen J, Gao K, Hozumi Y, Yin C, Wei GW. 2021. Analysis of SARS-CoV-2 mutations in the  
414 United States suggests presence of four substrains and novel variants. *Communications biology* 4: 228.  
415 DOI: <http://dx.doi.org/10.1038/s42003-021-01754-6>

416

417 World Health Organization. 2020. Coronavirus Disease (COVID-2019). Situation Reports. URL:  
418 <https://www.who.int/emergencies/diseases/novel-coronavirus-2019>



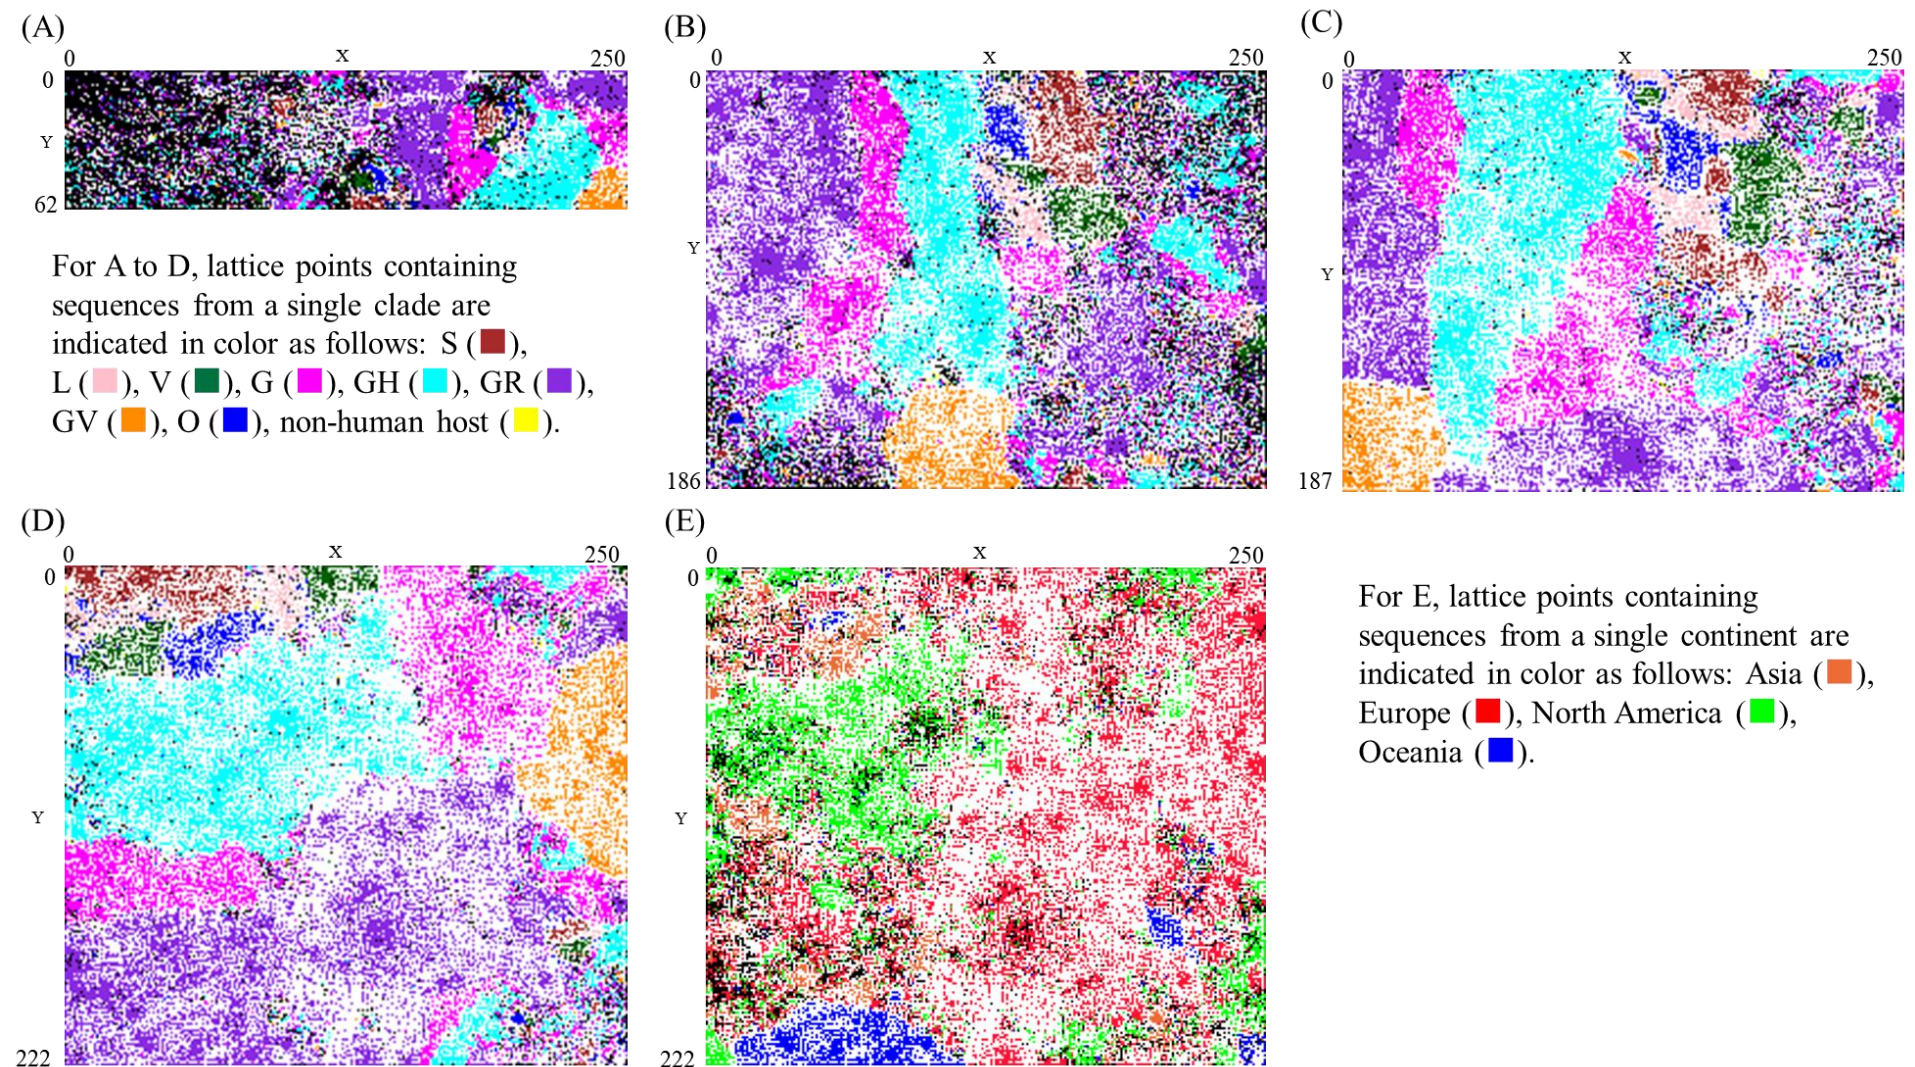

Figure 1



ALL

Asia

Europe

North America

Oceania

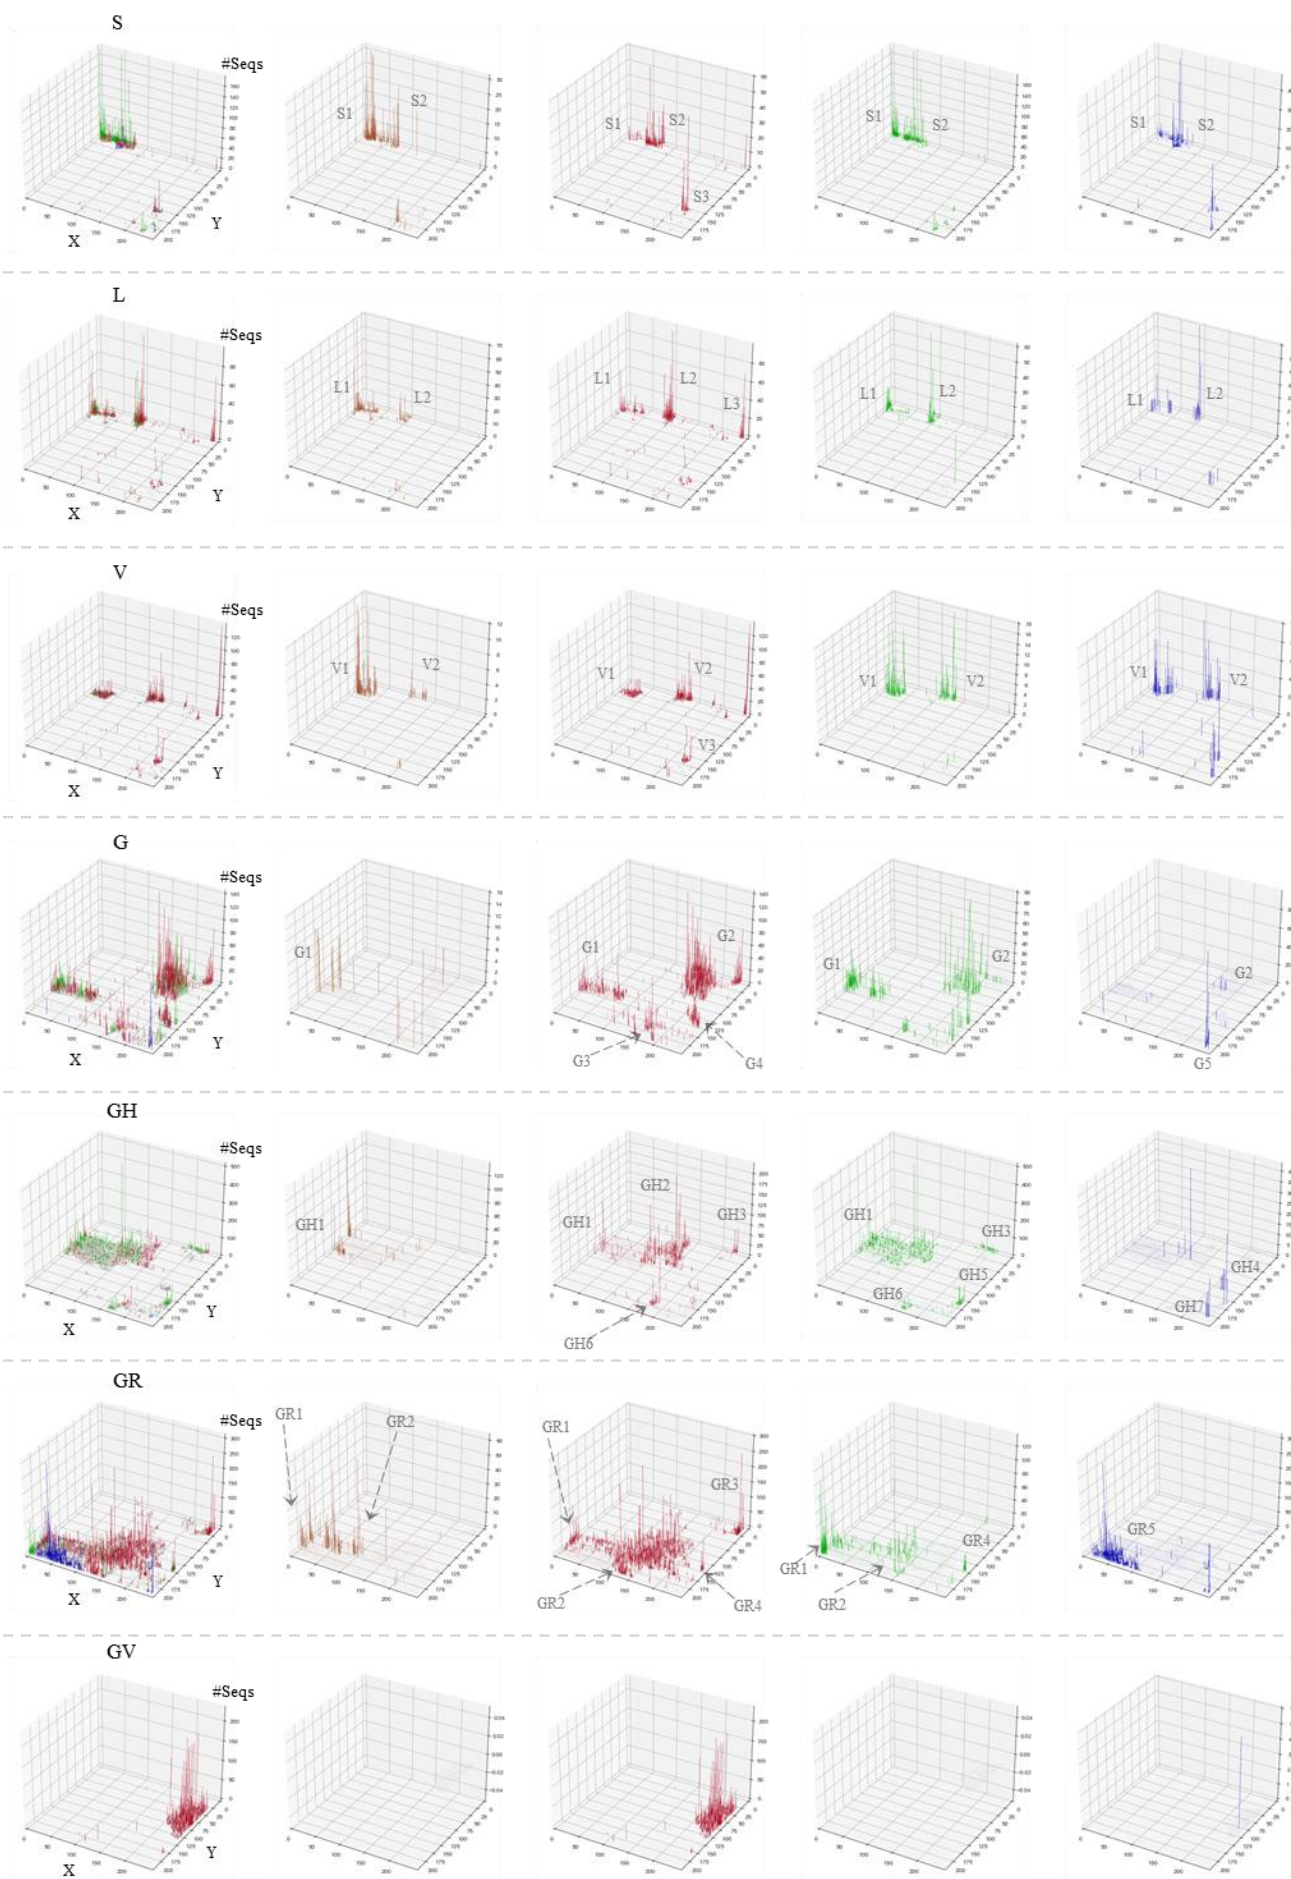

Figure 2

ALL 2019/12 2020/01 2020/02 2020/03 2020/04 2020/05 2020/06 2020/07 2020/08 2020/09 2020/10

Asia

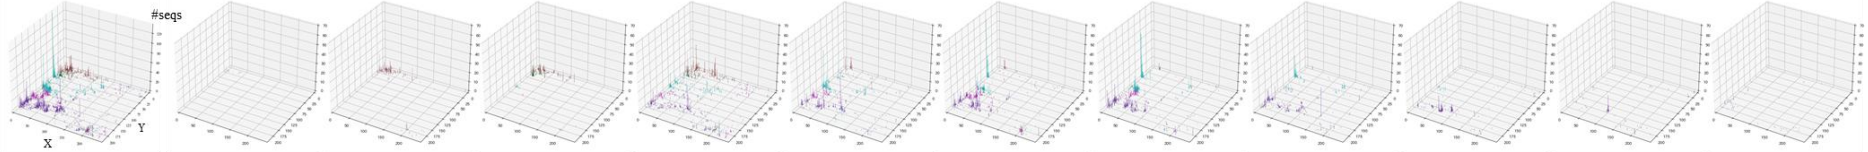

Europe

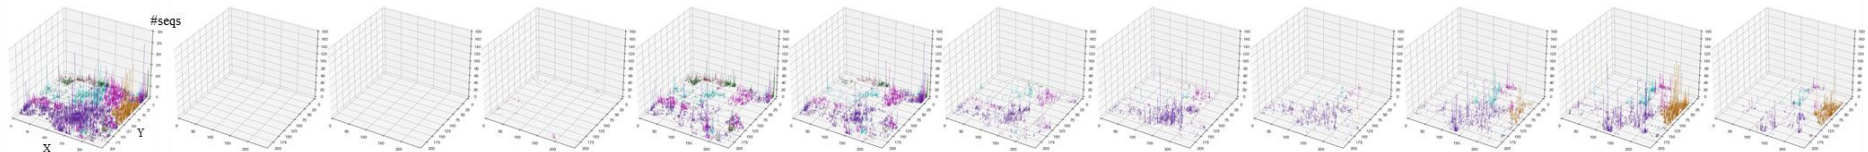

North America

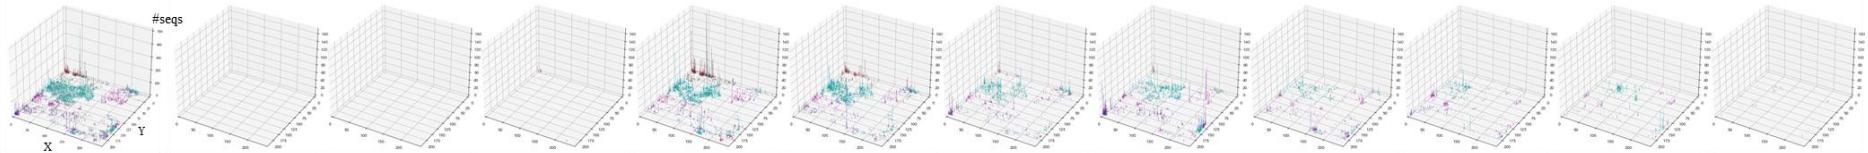

Oceania

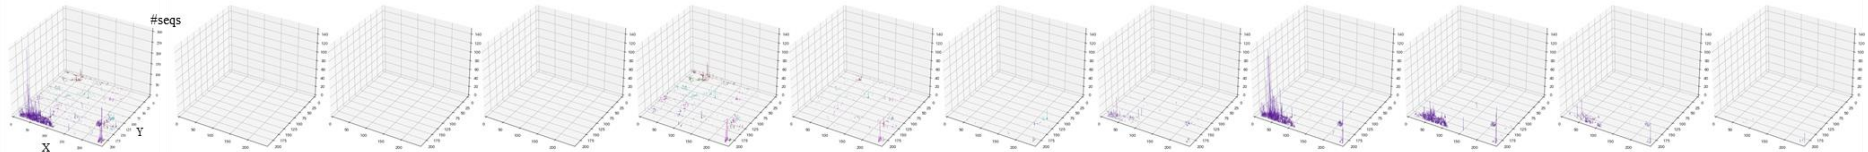

Figure 3



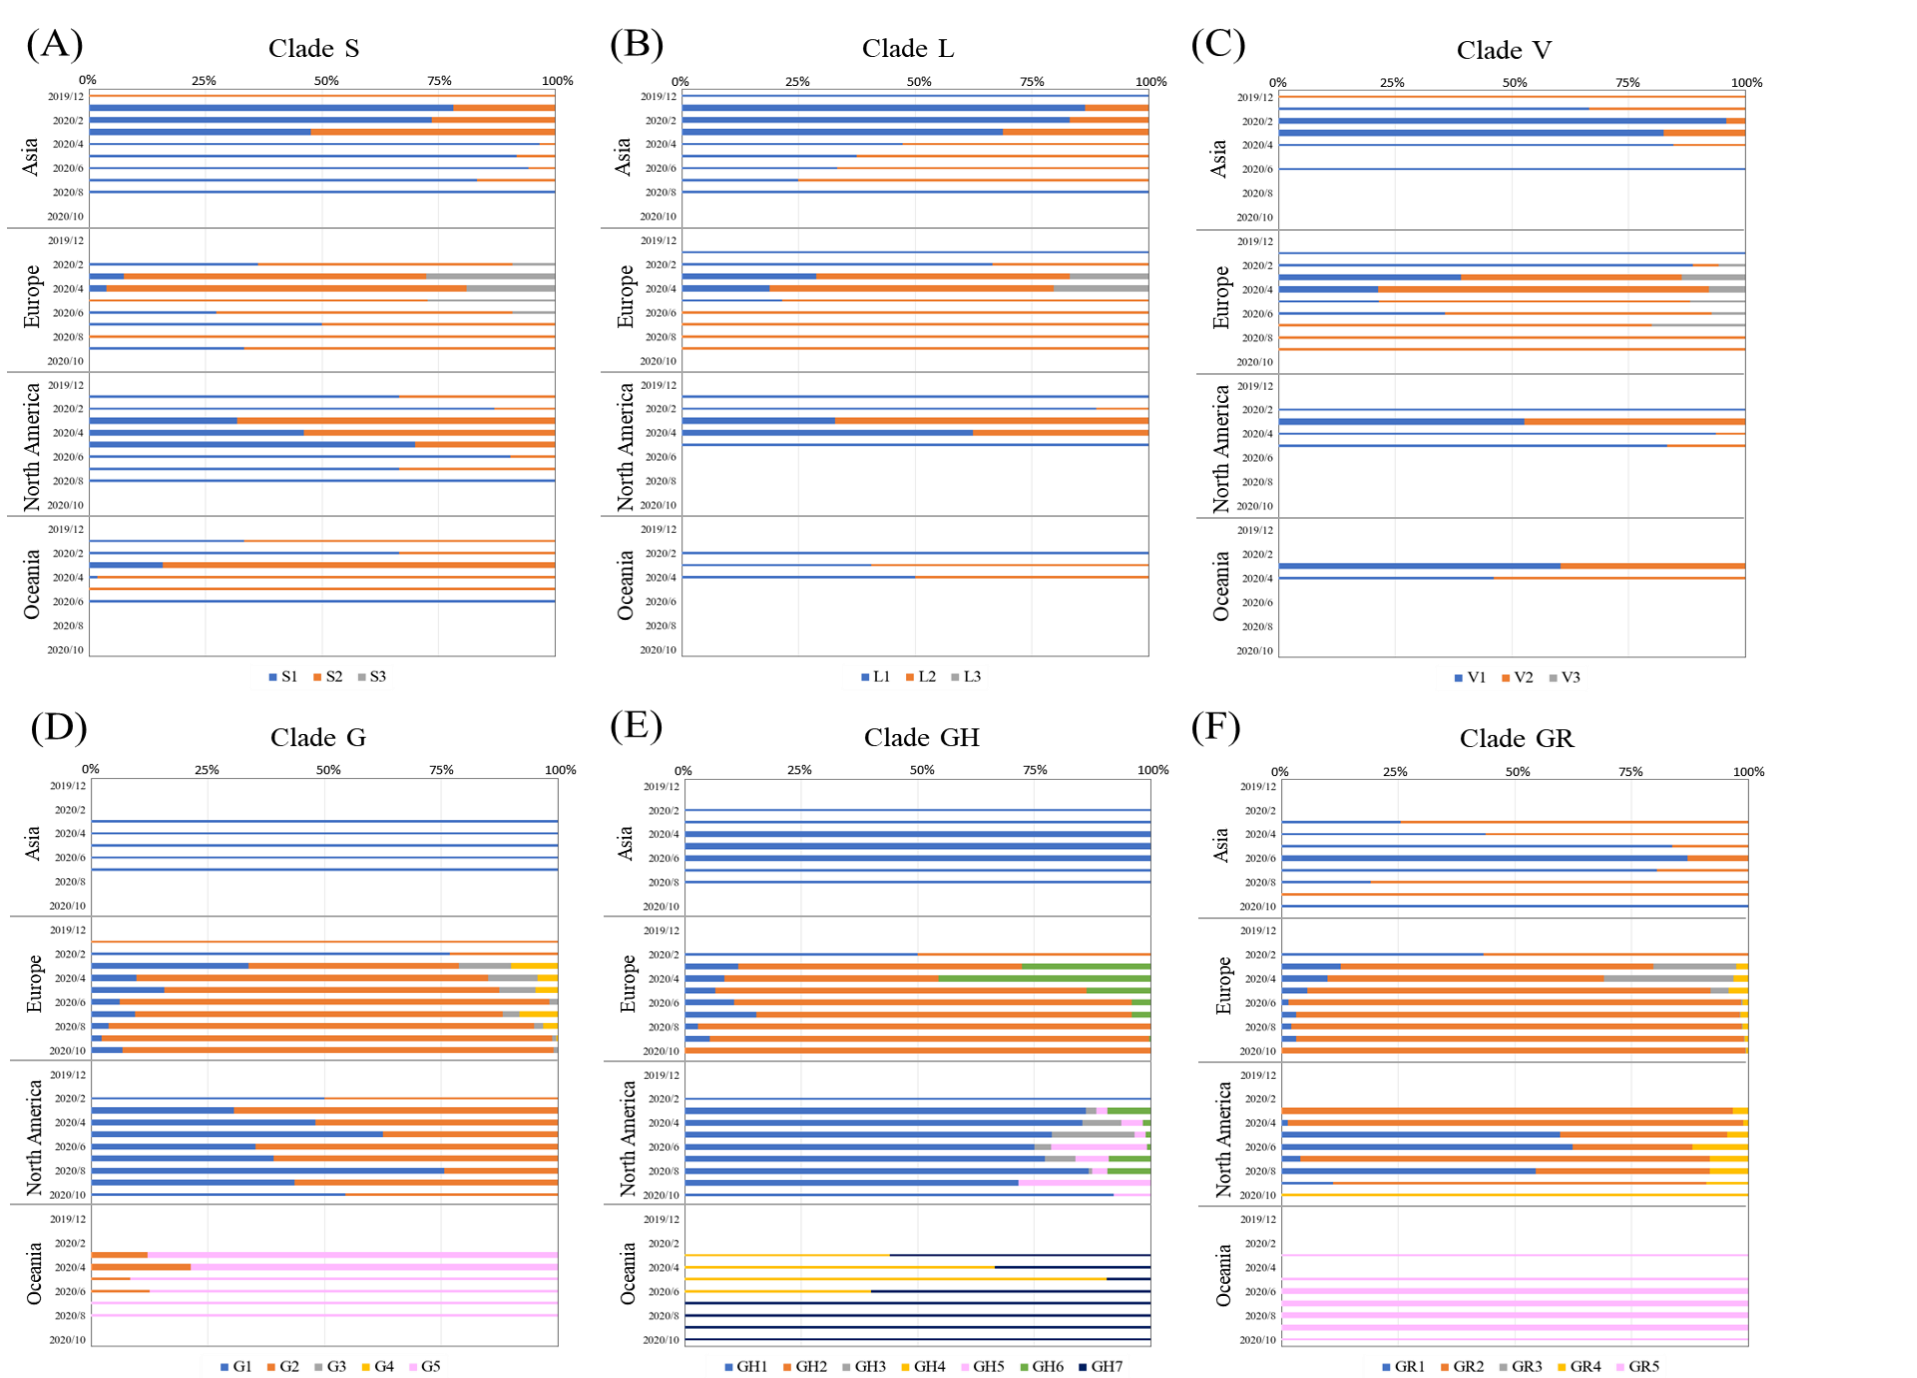

Figure 4

ALL

Asia

Europe

North America

Oceania

S

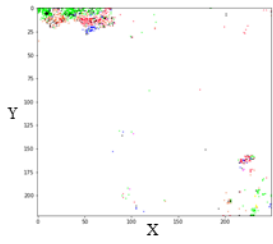

S1

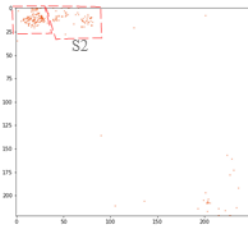

S1

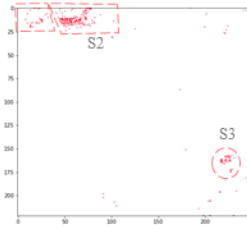

S1

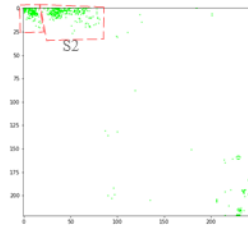

S1

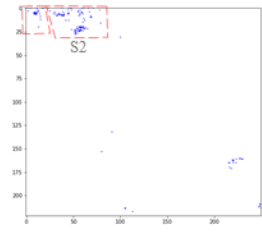

L

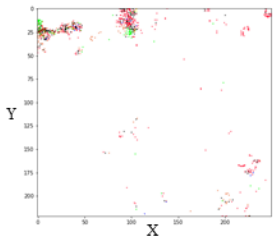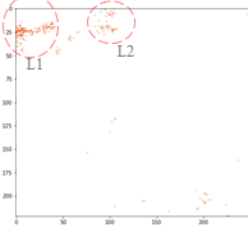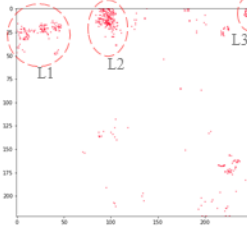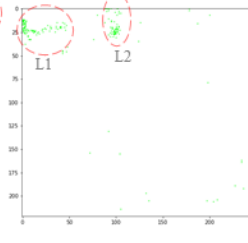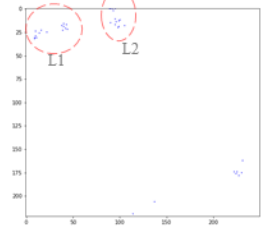

V

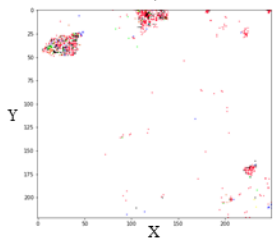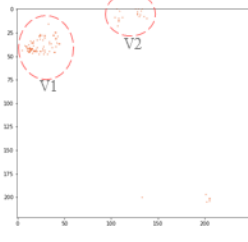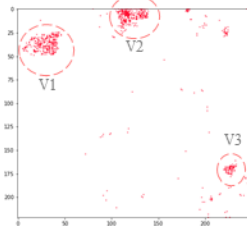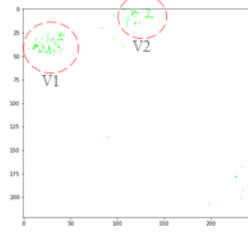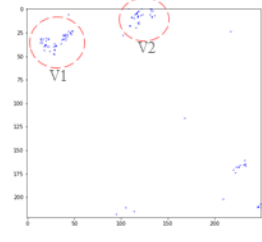

G

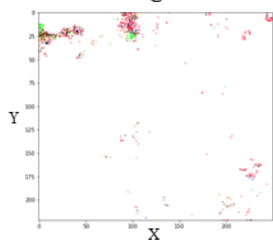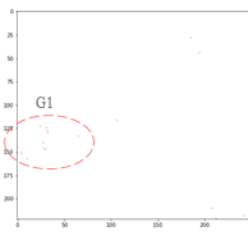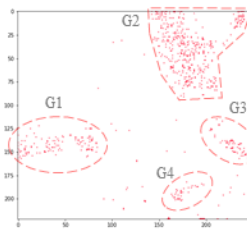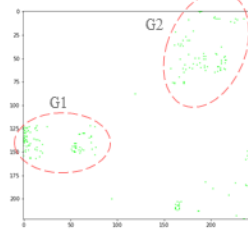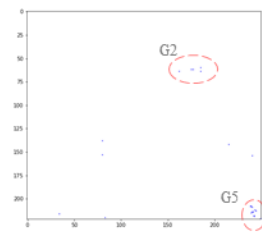

GH

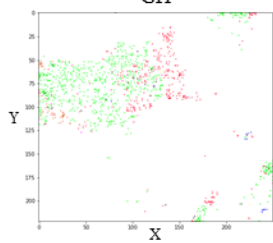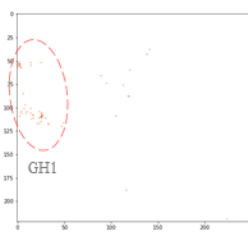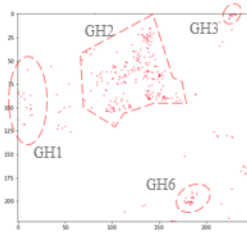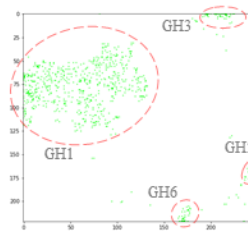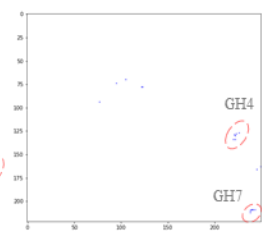

GR

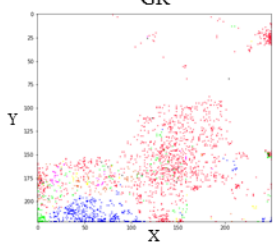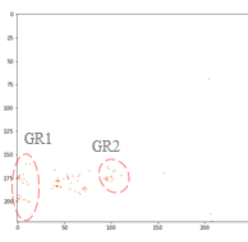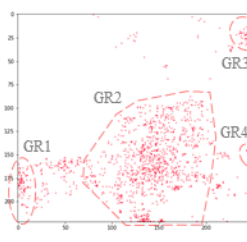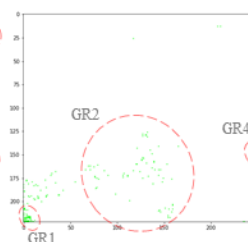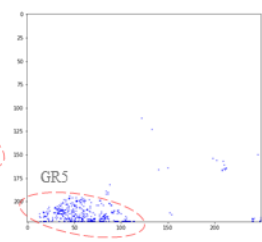

GV

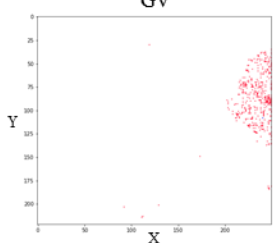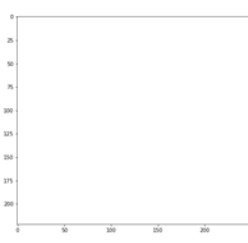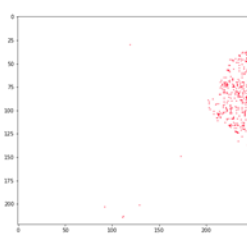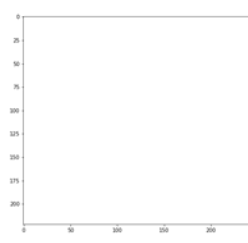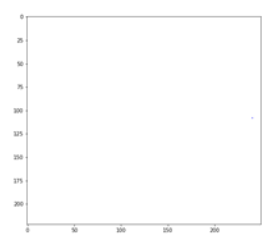

Supplementary Table 1. Sequence number of subdivided cluster in clade for each month by continent.

| Continent | Asia     |        |        |        |        |        |        |        |        |        | Europe   |         |        |        |        |        |        |        |        |        | North America |         |         |        |        |        |        |        |        |        | Oceania  |        |         |         |        |        |        |        |        |        | #Total |        |        |         |        |        |     |
|-----------|----------|--------|--------|--------|--------|--------|--------|--------|--------|--------|----------|---------|--------|--------|--------|--------|--------|--------|--------|--------|---------------|---------|---------|--------|--------|--------|--------|--------|--------|--------|----------|--------|---------|---------|--------|--------|--------|--------|--------|--------|--------|--------|--------|---------|--------|--------|-----|
| Clade     | Clade S  |        |        |        |        |        |        |        |        |        | Clade S  |         |        |        |        |        |        |        |        |        | Clade S       |         |         |        |        |        |        |        |        |        | Clade S  |        |         |         |        |        |        |        |        |        | #Total |        |        |         |        |        |     |
| Month     | 2019/12  | 2020/1 | 2020/2 | 2020/3 | 2020/4 | 2020/5 | 2020/6 | 2020/7 | 2020/8 | 2020/9 | 2020/10  | 2019/12 | 2020/1 | 2020/2 | 2020/3 | 2020/4 | 2020/5 | 2020/6 | 2020/7 | 2020/8 | 2020/9        | 2020/10 | 2019/12 | 2020/1 | 2020/2 | 2020/3 | 2020/4 | 2020/5 | 2020/6 | 2020/7 | 2020/8   | 2020/9 | 2020/10 | 2019/12 | 2020/1 | 2020/2 | 2020/3 | 2020/4 | 2020/5 | 2020/6 | 2020/7 | 2020/8 | 2020/9 | 2020/10 | #Total |        |     |
| S1        |          | 112    | 95     | 122    | 59     | 34     | 17     | 5      | 1      |        |          | 4       | 52     | 8      |        | 3      | 1      |        |        | 1      |               |         | 2       | 47     | 603    | 276    | 91     | 67     | 2      | 1      |          |        |         | 1       | 2      | 46     | 1      |        | 1      |        |        |        |        |         | 1,654  |        |     |
| S2        | 1        | 31     | 34     | 134    | 2      | 3      | 1      | 1      |        |        |          | 6       | 449    | 163    | 16     | 7      | 1      | 4      | 2      |        |               |         | 1       | 7      | 1,293  | 323    | 39     | 7      | 1      |        |          |        |         | 2       | 1      | 244    | 54     | 2      |        |        |        |        |        |         | 2,829  |        |     |
| S3        |          |        |        |        |        |        |        |        |        |        |          | 1       | 191    | 40     | 6      | 1      |        |        |        |        |               |         |         |        |        |        |        |        |        |        |          |        |         |         |        |        |        |        |        |        |        |        |        |         | 239    |        |     |
| #Total    | 1        | 143    | 129    | 256    | 61     | 37     | 18     | 6      | 1      |        |          | 11      | 692    | 211    | 22     | 11     | 2      | 4      | 3      |        |               |         | 3       | 54     | 1,896  | 599    | 130    | 74     | 3      | 1      |          |        |         | 3       | 3      | 290    | 55     | 2      | 1      |        |        |        |        |         | 4,722  |        |     |
| Clade     | Clade L  |        |        |        |        |        |        |        |        |        | Clade L  |         |        |        |        |        |        |        |        |        | Clade L       |         |         |        |        |        |        |        |        |        | Clade L  |        |         |         |        |        |        |        |        |        | #Total |        |        |         |        |        |     |
| L1        | 21       | 172    | 169    | 144    | 9      | 3      | 3      | 1      | 3      |        |          | 1       | 14     | 297    | 92     | 11     |        |        |        |        |               |         | 4       | 8      | 88     | 113    | 19     |        |        |        |          |        |         | 1       | 13     | 3      |        |        |        |        |        |        |        |         | 1,189  |        |     |
| L2        |          | 27     | 34     | 65     | 10     | 5      | 6      | 3      |        |        |          | 7       | 562    | 297    | 40     | 9      | 2      | 1      | 2      |        |               |         |         |        | 1      | 180    | 68     |        |        |        |          |        |         |         |        | 19     | 3      |        |        |        |        |        |        |         | 1,341  |        |     |
| L3        |          |        |        |        |        |        |        |        |        |        |          |         |        | 174    | 99     |        |        |        |        |        |               |         |         |        |        |        |        |        |        |        |          |        |         |         |        |        |        |        |        |        |        |        |        |         | 273    |        |     |
| #Total    | 21       | 199    | 203    | 209    | 19     | 8      | 9      | 4      | 3      |        |          | 1       | 21     | 1,033  | 488    | 51     | 9      | 2      | 1      | 2      |               |         | 4       | 9      | 268    | 181    | 19     |        |        |        |          |        |         | 1       | 32     | 6      |        |        |        |        |        |        |        |         | 2,803  |        |     |
| Clade     | Clade V  |        |        |        |        |        |        |        |        |        | Clade V  |         |        |        |        |        |        |        |        |        | Clade V       |         |         |        |        |        |        |        |        |        | Clade V  |        |         |         |        |        |        |        |        |        | #Total |        |        |         |        |        |     |
| V1        |          | 2      | 98     | 85     | 11     |        | 1      |        |        |        |          | 1       | 16     | 542    | 126    | 11     | 15     |        |        |        |               |         | 2       | 136    | 75     | 5      |        |        |        |        |          |        |         |         |        | 81     | 6      |        |        |        |        |        |        |         | 1,213  |        |     |
| V2        | 1        | 1      | 4      | 18     | 2      |        |        |        |        |        |          | 1       | 657    | 420    | 34     | 24     | 4      | 1      | 4      |        |               |         |         |        | 122    | 5      | 1      |        |        |        |          |        |         |         |        | 53     | 7      |        |        |        |        |        |        |         | 1,359  |        |     |
| V3        |          |        |        |        |        |        |        |        |        |        |          | 1       | 187    | 46     | 6      | 3      | 1      |        |        |        |               |         |         |        |        |        |        |        |        |        |          |        |         |         |        |        |        |        |        |        |        |        |        |         | 244    |        |     |
| #Total    | 1        | 3      | 102    | 103    | 13     |        | 1      |        |        |        |          | 1       | 18     | 1,386  | 592    | 51     | 42     | 5      | 1      | 4      |               |         | 2       | 258    | 80     | 6      |        |        |        |        |          |        |         |         |        | 134    | 13     |        |        |        |        |        |        |         | 2,816  |        |     |
| Clade     | Clade G  |        |        |        |        |        |        |        |        |        | Clade G  |         |        |        |        |        |        |        |        |        | Clade G       |         |         |        |        |        |        |        |        |        | Clade G  |        |         |         |        |        |        |        |        |        | #Total |        |        |         |        |        |     |
| G1        |          |        |        | 5      | 23     | 33     | 29     | 1      |        |        |          | 30      | 861    | 272    | 118    | 31     | 21     | 23     | 22     | 23     |               |         | 1       | 107    | 259    | 179    | 200    | 101    | 174    | 51     | 6        |        |         |         |        | 19     | 25     | 1      | 1      |        |        |        |        |         | 2,570  |        |     |
| G2        |          |        |        |        |        |        |        |        |        |        |          | 4       | 9      | 1,152  | 2,121  | 540    | 465    | 175    | 568    | 961    | 316           |         |         | 1      | 242    | 280    | 107    | 368    | 157    | 56     | 66       | 5      |         |         |        |        |        |        |        |        |        |        |        |         |        | 7,639  |     |
| G3        |          |        |        |        |        |        |        |        |        |        |          |         |        | 288    | 294    | 58     | 9      | 8      | 12     | 8      | 3             |         |         |        |        |        |        |        |        |        |          |        |         |         |        |        |        |        |        |        |        |        |        |         |        | 680    |     |
| G4        |          |        |        |        |        |        |        |        |        |        |          |         |        | 253    | 122    | 36     |        | 18     | 19     | 3      |               |         |         |        |        |        |        |        |        |        |          |        |         |         |        |        |        |        |        |        |        |        |        |         | 451    |        |     |
| G5        |          |        |        | 5      | 23     | 33     | 29     | 1      |        |        |          | 4       | 39     | 2,554  | 2,809  | 752    | 505    | 222    | 622    | 994    | 342           |         |         | 2      | 349    | 539    | 286    | 568    | 258    | 230    | 117      | 11     |         |         |        |        | 138    | 92     | 11     | 7      | 27     | 1      |        |         |        | 276    |     |
| #Total    |          |        |        | 5      | 23     | 33     | 29     | 1      |        |        |          | 4       | 39     | 2,554  | 2,809  | 752    | 505    | 222    | 622    | 994    | 342           |         |         | 2      | 349    | 539    | 286    | 568    | 258    | 230    | 117      | 11     |         |         |        |        | 157    | 117    | 12     | 8      | 27     | 1      |        |         |        | 11,616 |     |
| Clade     | Clade GH |        |        |        |        |        |        |        |        |        | Clade GH |         |        |        |        |        |        |        |        |        | Clade GH      |         |         |        |        |        |        |        |        |        | Clade GH |        |         |         |        |        |        |        |        |        | #Total |        |        |         |        |        |     |
| GH1       |          |        | 4      | 39     | 142    | 239    | 310    | 97     | 6      |        |          | 1       | 115    | 82     | 30     | 16     | 23     | 24     | 59     |        |               |         | 1       | 2,936  | 1,946  | 1,178  | 1,463  | 477    | 409    | 394    | 35       |        |         |         |        |        |        |        |        |        |        |        |        |         | 10,026 |        |     |
| GH2       |          |        |        |        |        |        |        |        |        |        |          | 1       | 606    | 441    | 363    | 129    | 121    | 814    | 1,034  | 295    |               |         |         |        | 77     | 191    | 266    | 69     | 41     | 3      |          |        |         |         |        | 11     | 16     | 29     | 2      |        |        |        |        |         | 3,804  |        |     |
| GH3       |          |        |        |        |        |        |        |        |        |        |          |         |        |        |        |        |        |        |        |        |               |         |         |        |        |        |        |        |        |        |          |        |         |         |        |        |        |        |        |        |        |        |        |         | 647    |        |     |
| GH4       |          |        |        |        |        |        |        |        |        |        |          |         |        |        |        |        |        |        |        |        |               |         |         |        |        |        |        |        |        |        |          |        |         |         |        |        |        |        |        |        |        |        |        |         | 58     |        |     |
| GH5       |          |        |        |        |        |        |        |        |        |        |          |         |        |        |        |        |        |        |        |        |               |         |         |        | 80     | 106    | 36     | 402    | 44     | 16     | 156      | 3      |         |         |        |        |        |        |        |        |        |        |        |         |        | 843    |     |
| GH6       |          |        |        |        |        |        |        |        |        |        |          |         |        | 274    | 436    | 62     | 6      | 6      |        | 2      |               |         |         |        | 313    | 37     | 15     | 14     | 55     | 43     |          |        |         |         |        | 14     | 8      | 3      | 3      | 13     | 8      | 9      | 1      |         | 1,263  |        |     |
| GH7       |          |        |        |        |        |        |        |        |        |        |          |         |        |        |        |        |        |        |        |        |               |         |         |        |        |        |        |        |        |        |          |        |         |         |        |        |        |        |        |        |        |        |        |         | 59     |        |     |
| #Total    |          |        | 4      | 39     | 142    | 239    | 310    | 97     | 6      |        |          | 2       | 995    | 959    | 455    | 151    | 150    | 838    | 1,095  | 295    |               |         | 1       | 3,406  | 2,280  | 1,495  | 1,948  | 617    | 471    | 550    | 38       |        |         |         |        | 25     | 24     | 33     | 5      | 13     | 8      | 9      | 1      |         | 16,700 |        |     |
| Clade     | Clade GR |        |        |        |        |        |        |        |        |        | Clade GR |         |        |        |        |        |        |        |        |        | Clade GR      |         |         |        |        |        |        |        |        |        | Clade GR |        |         |         |        |        |        |        |        |        | #Total |        |        |         |        |        |     |
| GR1       |          |        |        | 21     | 42     | 72     | 121    | 74     | 9      |        | 4        | 13      | 284    | 378    | 94     | 53     | 52     | 62     | 115    |        |               |         | 0       | 3      | 241    | 586    | 6      | 60     | 5      |        |          |        |         |         |        |        |        |        |        |        |        |        |        |         | 2,295  |        |     |
| GR2       |          |        |        | 61     | 54     | 14     | 18     | 18     | 38     | 34     |          | 0       | 17     | 1,499  | 2,287  | 1,466  | 3,365  | 1,565  | 2,895  | 3,488  | 1,091         |         |         | 0      | 176    | 213    | 144    | 240    | 129    | 41     | 36       |        |         |         |        |        |        |        |        |        |        |        |        |         |        | 18,889 |     |
| GR3       |          |        |        |        |        |        |        |        |        |        |          |         |        | 397    | 1,072  | 66     | 9      | 2      | 3      | 8      | 2             |         |         |        |        |        |        |        |        |        |          |        |         |         |        |        |        |        |        |        |        |        |        |         |        | 1,559  |     |
| GR4       |          |        |        |        |        |        |        |        |        |        |          |         |        | 55     | 117    | 70     | 40     | 27     | 34     | 24     | 4             |         |         |        |        | 6      | 2      | 18     | 112    | 12     | 9        | 4      | 1       |         |        |        |        |        |        |        |        |        |        |         |        |        | 535 |
| GR5       |          |        |        |        |        |        |        |        |        |        |          |         |        |        |        |        |        |        |        |        |               |         |         |        |        |        |        |        |        |        |          |        |         |         |        | 1      |        | 5      | 260    | 3,722  | 1,576  | 314    | 3      |         | 5,881  |        |     |
| #Total    | 0        | 0      | 0      | 82     | 96     | 86     | 139    | 92     | 47     | 34     | 4        | 0       | 0      | 30     | 2,235  | 3,854  | 1,696  | 3,467  | 1,646  | 2,994  | 3,635         | 1,097   | 0       | 0      | 0      | 182    | 218    | 403    | 938    | 147    | 110      | 45     | 1       | 0       | 0      | 0      | 1      | 0      | 5      | 260    | 3,722  | 1,576  | 314    | 3       | 29,159 |        |     |
